# Supplementary material for: Light soaking effects on charge recombination and device performance in dye sensitized solar cells based on indoline–cyclopentadithiophene chromophores
Source: Royal Society of Chemistry journal article supplement (doi:10.1039/c3ta11242j), 2013-01-01
Supplement: c3ta11242j.pdf [file c3ta11242j.pdf]

**Supporting Information**

**Light soaking effects on Charge Recombination and  
Device Performance in Dye Sensitized Solar Cells Based  
on Indoline-Cyclopentadithiophene Chromophores**

**Lydia Cabau,<sup>a</sup> Laia Pellejà,<sup>a</sup> John N. Clifford,<sup>a\*</sup> Challuri Vijay Kumar<sup>a\*</sup> and Emilio Palomares<sup>a,b</sup>**

<sup>a</sup>Institute of Chemical Research of Catalonia, Avda. Països Catalans, 16, Tarragona E-43007, Spain. Fax: +34 977 920 224; Tel: +34 977 920 241; E-mail: vchallury@iciq.es and jnclifford@iciq.es

<sup>b</sup>ICREA, Passeig Lluís Companys 28, E-08012 Barcelona, Spain

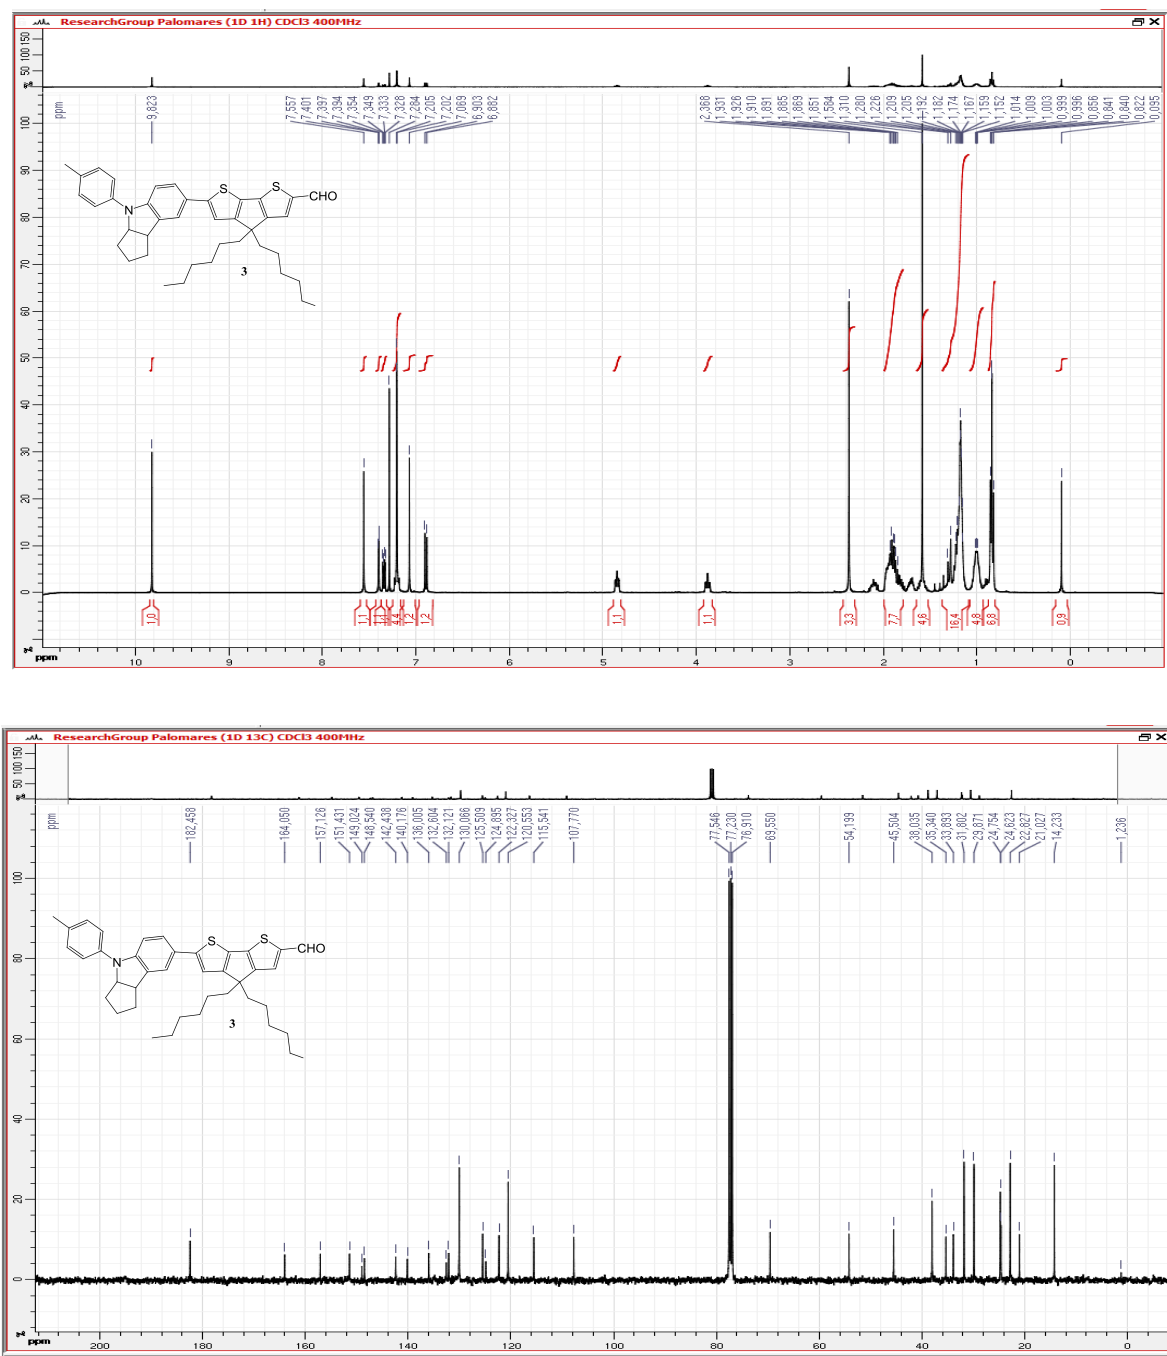

**Fig. S1** <sup>1</sup>H NMR (upper) and <sup>13</sup>C NMR (lower) spectra of compound **3** recorded in CDCl<sub>3</sub>.

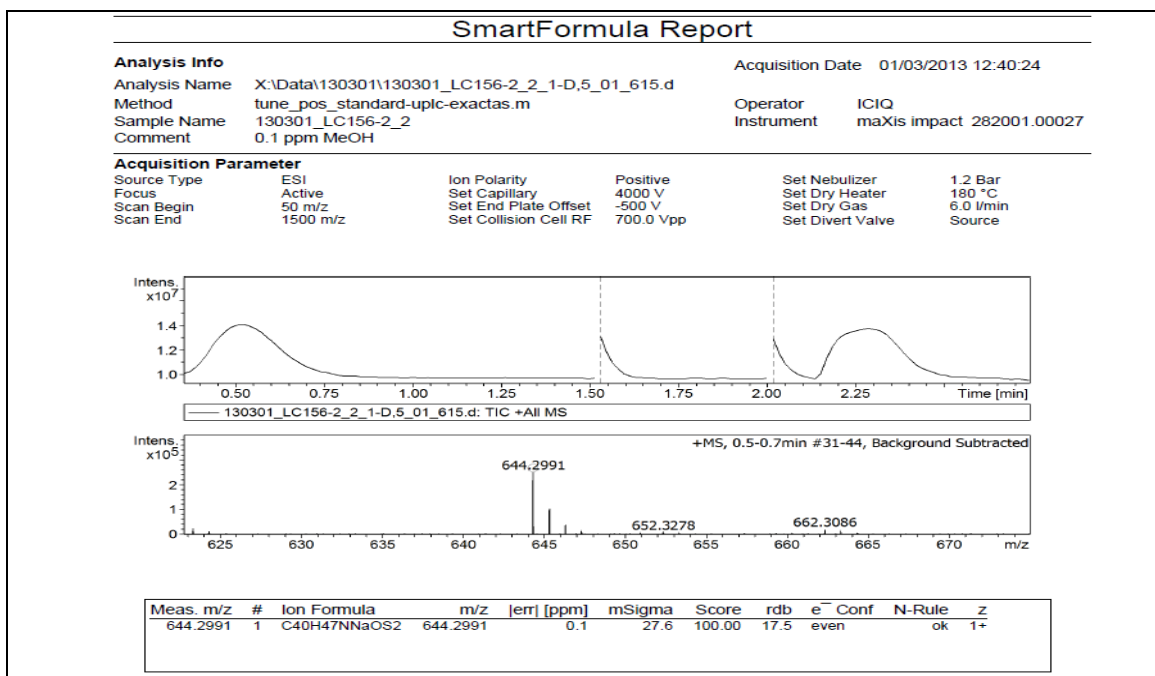

**Fig. S2** HRMS (ESI) spectrum of compound **3**.

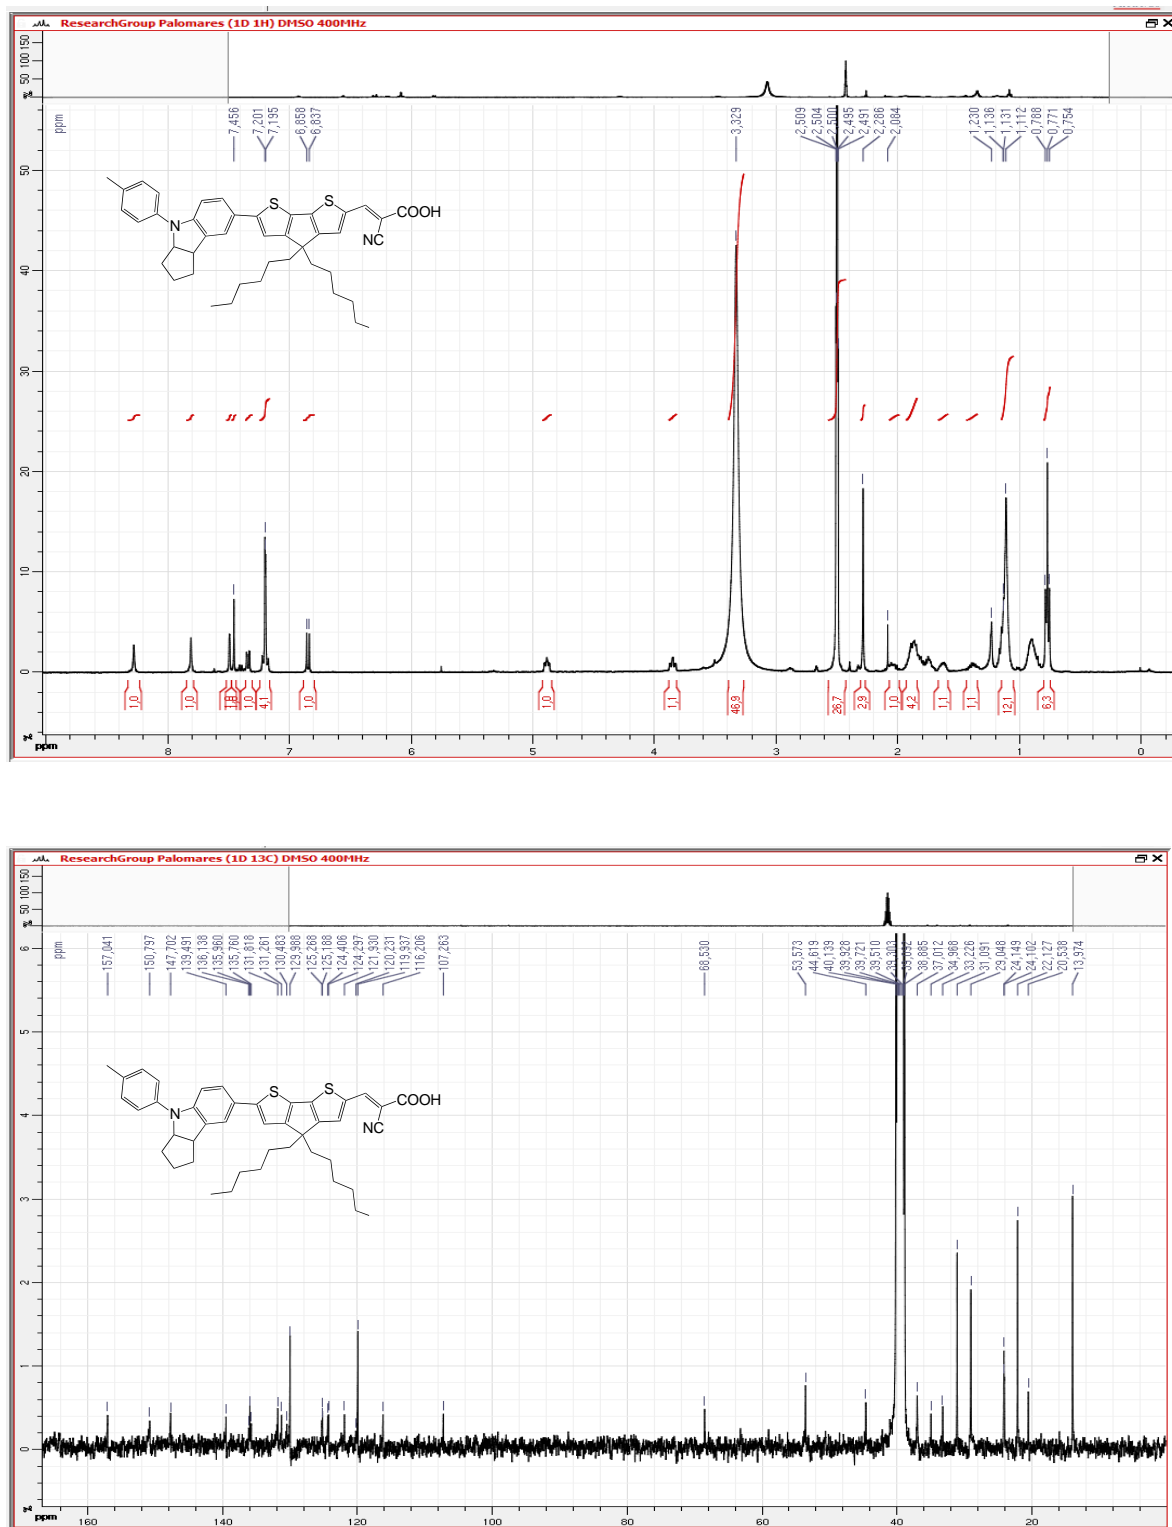

**Fig. S3**  $^1H$  NMR (upper) and  $^{13}C$  NMR (lower) spectra of compound **VCL01** recorded in DMSO- $d_6$ .

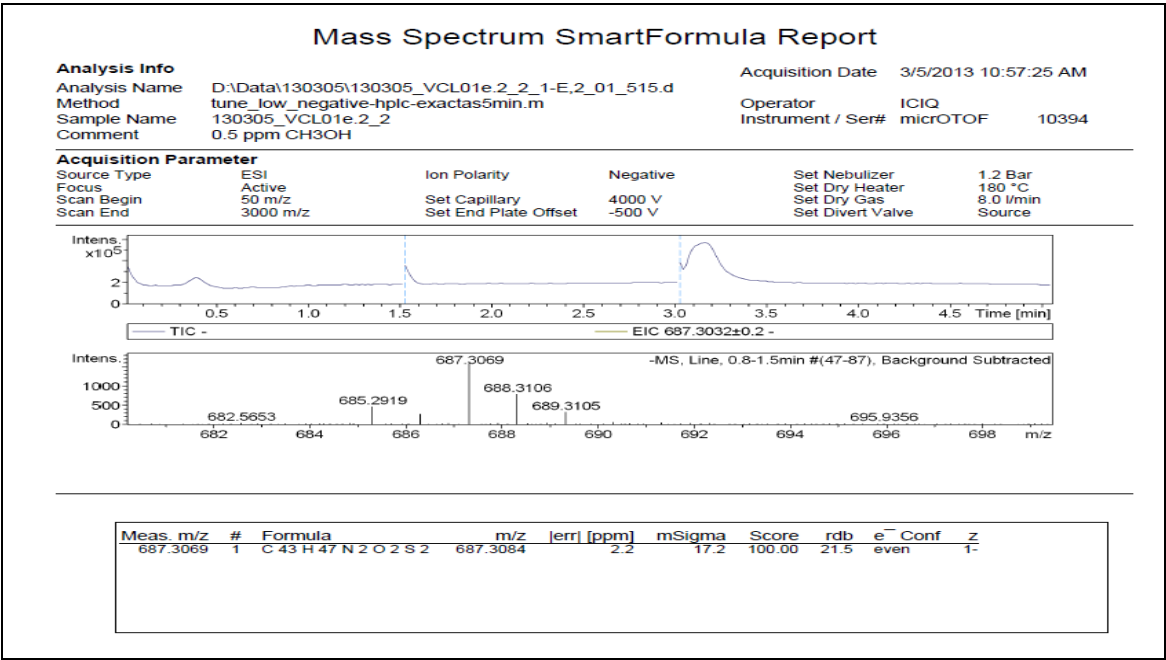

**Fig. S4** HRMS (ESI) spectrum of compound **VCL01**.

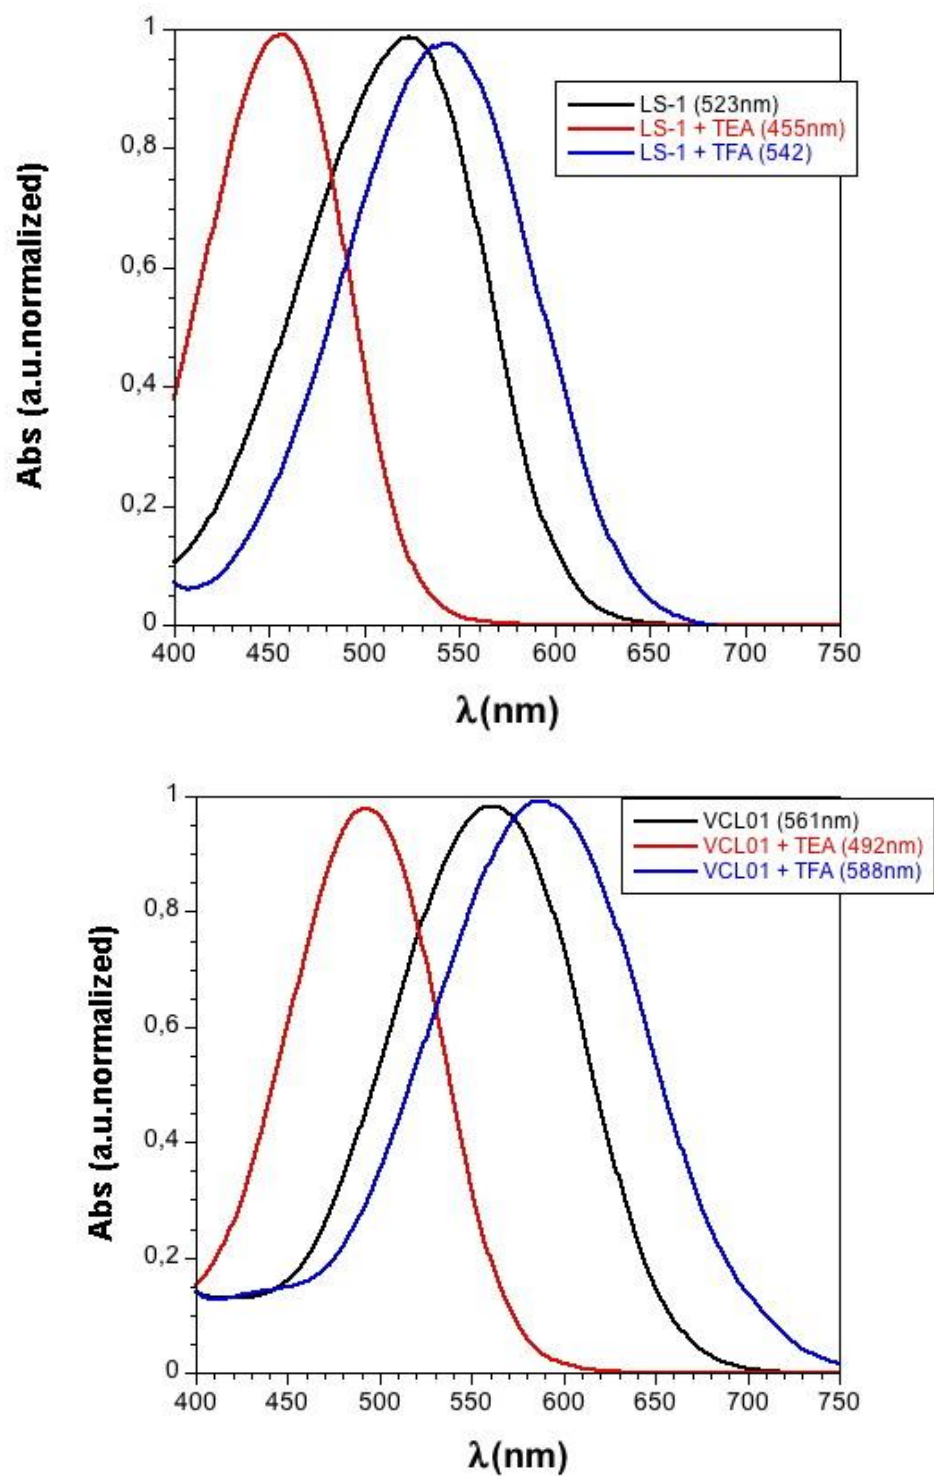

**Fig. S5** Absorption spectra of dichloromethane solutions of **LS-1** and **VCL01** in the presence of organic base (TEA, triethylamine) and organic acid (TFA, trifluoroacetic acid).

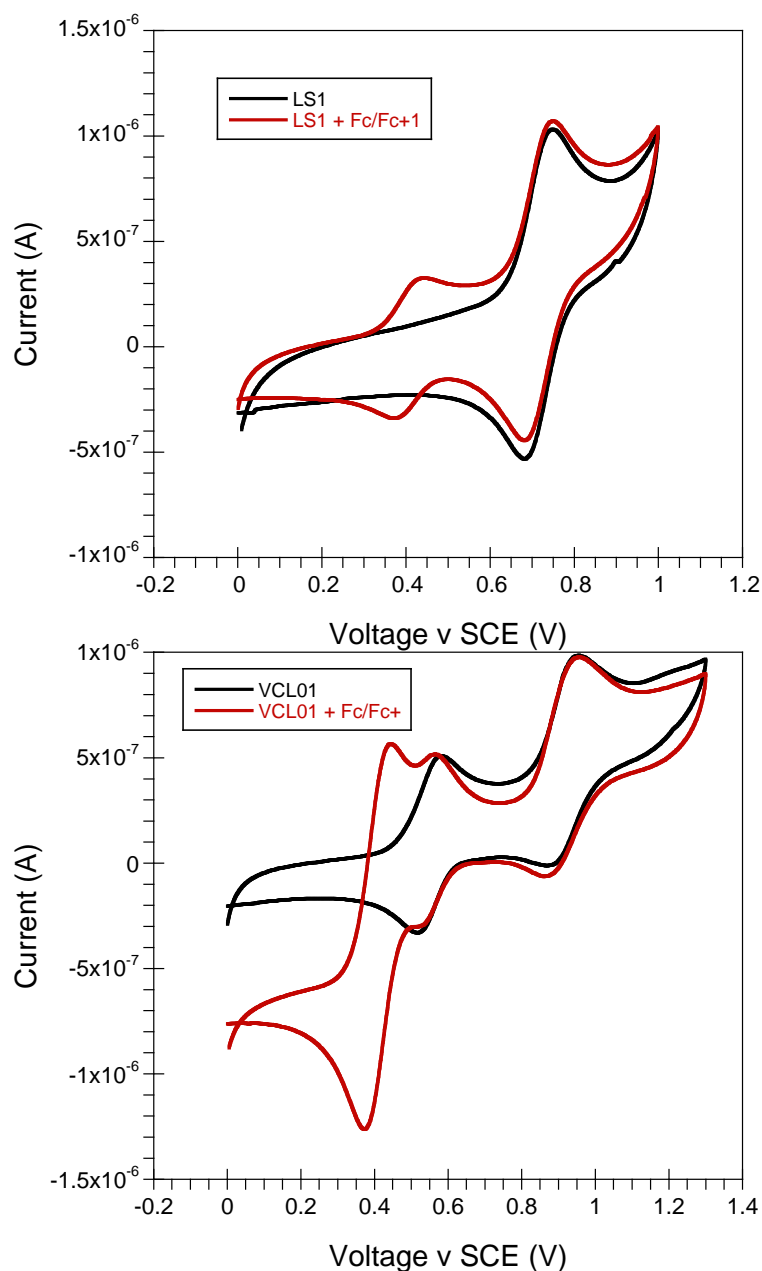

**Fig. S6** Cyclic voltammetry of **LS-1** (top) and **VCL01** (bottom) recorded in 0.1M tetrabutylammonium hexafluorophosphate in 1:1 acetonitrile:*tert*-butanol at a scan rate of  $10 \text{ mV s}^{-1}$ . The working electrode consisted of a platinum wire and the counter electrode a platinum mesh. The reference electrode was the silver calomel electrode (saturated KCl). All solutions were degassed with argon for 5 mins prior to measurement. The red and black scans were recorded in the presence and absence of Ferrocene/Ferrocene+.

**Table S1.** Device properties of **LS-1** and **VCL01** DSCs.

| Dye                                            | $V_{oc}$<br>(V) | $J_{sc}$<br>(mA/cm <sup>2</sup> ) | $FF$<br>(%) | $\eta$<br>(%)* |
|------------------------------------------------|-----------------|-----------------------------------|-------------|----------------|
| <b>LS-1</b><br>(No chenoxyldechloric acid)     | 0.66            | 8.44                              | 67.41       | 3.79           |
| <b>LS-1</b><br>(10 mM chenoxyldechloric acid)  | 0.73            | 14.06                             | 66.20       | 6.83           |
| <b>VCL01</b><br>(No chenoxyldechloric acid)    | 0.67            | 12.75                             | 67.44       | 5.81           |
| <b>VCL01</b><br>(10 mM chenoxyldechloric acid) | 0.60            | 5.25                              | 71.22       | 2.27           |

\*Efficiencies recorded without mask.

**Table S2.** Device properties of **LS-1** and **VCL01** DSCs before and after heating at 40°C for 120 mins.

| Dye                   | $J_{sc}$<br>(mA/cm <sup>2</sup> ) | $V_{oc}$ (V) | $FF$ (%) | $\eta$ (%) |
|-----------------------|-----------------------------------|--------------|----------|------------|
| <b>LS-1</b> 0 mins    | 13.52                             | 0.69         | 72       | 6.70       |
| <b>LS-1</b> 120 mins  | 13.75                             | 0.68         | 72       | 6.81       |
| <b>VCL01</b> 0 mins   | 7.85                              | 0.61         | 70       | 3.32       |
| <b>VCL01</b> 120 mins | 8.46                              | 0.60         | 70       | 3.57       |

\*Efficiencies recorded with 0.16cm<sup>2</sup> mask.

**Table S3.** Emission lifetimes extracted from TC-SPC data of **LS-1** and **VCL01** DSC devices.

| Dye                     | <i>Lifetime (ns)*</i>  |
|-------------------------|------------------------|
| <b>LS-1</b> (0 mins)    | 1.20 (42%); 2.96 (58%) |
| <b>LS-1</b> (100 mins)  | 1.39 (41%); 2.99 (59%) |
| <b>VCL01</b> (0 mins)   | 1.83 (75%); 3.37 (25%) |
| <b>VCL01</b> (100 mins) | 2.02 (92%); 4.79 (8%)  |

\*Emission decays were fitted with 2 exponential parameters. The percentage in parenthesis is the contribution of each parameter.
